# Supplementary material for: Aggregation induced emission based fluorescence pH and temperature sensors: probing polymer interactions in poly(N-isopropyl acrylamide-co-tetra(phenyl)ethene acrylate)/poly(methacrylic acid) interpenetrating polymer networks
Source: Royal Society of Chemistry journal article supplement (doi:10.1039/c5tc00752f), 2015-01-01
Supplement: c5tc00752f1.pdf [file c5tc00752f1.pdf]

## ***SUPPORTING INFORMATION***

### **Aggregation Induced Emission Based Fluorescence pH and Temperature Sensors: Probing Polymer Interactions in Poly(*N*-isopropyl acrylamide-co-tetra(phenyl)ethene acrylate)/Poly(methacrylic acid) Interpenetrating Polymer Networks**

Hui Zhou,<sup>†</sup> Feng Liu,<sup>‡</sup> Xiaobai Wang,<sup>†</sup> Hong Yan,<sup>†</sup> Jing Song,<sup>†</sup> Qun Ye,<sup>†</sup> Ben Zhong Tang\*,<sup>§</sup> and Jianwei Xu\*,<sup>†,‡</sup>

<sup>†</sup>Institute of Materials Research and Engineering, A\*STAR (Agency for Science, Technology and Research), 3 Research Link, Singapore 117602, Republic of Singapore.

<sup>‡</sup>Department of Chemistry, National University of Singapore, 3 Science Drive 3, Singapore 117543, Republic of Singapore.

<sup>§</sup>Department of Chemistry, The Hong Kong University of Science & Technology, Clear Water Bay, Kowloon, Hong Kong, China.

\*Corresponding author: Jianwei Xu and Ben Zhong Tang

Email address: [jw-xu@imre.a-star.edu.sg](mailto:jw-xu@imre.a-star.edu.sg); [tangbenz@ust.hk](mailto:tangbenz@ust.hk)

Mailing address: 3 Research Link, Singapore 117602

Tel: 65-6872-7543

Fax: 65-6872-7528

## Table content

**Scheme S1.** Synthetic routes of monomers (**M2** and **M3**) and corresponding copolymers (**P5** and **P6**). (3)

**Figure S1.**  $^1\text{H}$  NMR spectrum of **P1** in  $\text{CDCl}_3$ . (4)

**Figure S2.** (a) TGA thermograms of PNIPAM and **P1-6** recorded under nitrogen at a heating rate of  $20\text{ }^\circ\text{C}/\text{min}$ . (b) DSC thermograms of PNIPAM and **P1-6** recorded under nitrogen at a heating rate of  $10\text{ }^\circ\text{C}/\text{min}$ . (5)

**Figure S3.** ((a) Calibration curve for determination of copolymer composition, using 4-(1,2,2-triphenylvinyl)phenol (TPE-OH) as standard. (b) Enlarged calibration curve for **P4-P6**. The absorbance of TPE-OH at 318 nm was recorded in the presence of PNIPAM in THF.  $[\text{TPE-OH}] = 10^{-5}$  to  $10^{-4}$  M,  $[\text{PNIPAM}] = 0.50\text{ mg/mL}$ ,  $20\text{ }^\circ\text{C}$ . Open squares and circles are the data points for the standard and the copolymers, respectively. (5)

**Figure S4.** Fluorescence spectra of polymer **P1-6** in THF/ $\text{H}_2\text{O}$  mixtures ( $\lambda_{\text{ex}} = 318\text{ nm}$ ,  $[\text{P4}] = 0.5\text{ mg/mL}$ ,  $20\text{ }^\circ\text{C}$ ). (6-7)

**Figure S5.** Fluorescence spectrum of monomers (**M1-3**) and copolymers (**P1-6**) in solid state. Films were fabricated by drop coating of  $50.0\text{ }\mu\text{L}$  THF solution,  $[\text{C}] = 5.0\text{ mg/mL}$ . (7)

**Figure S6.** Fluorescence spectra of polymer in solution and film. **P4** and **P4+PS** in THF,  $[\text{P4}] = 0.5\text{ mg/mL}$ ,  $[\text{PS}] = 0.5\text{ mg/mL}$ . **P4** film was fabricated by drop coating of  $50.0\text{ }\mu\text{L}$  THF solution of **P4**,  $[\text{P4}] = 5.0\text{ mg/mL}$ . **P4+PS** film was fabricated by drop coating of  $50.0\text{ }\mu\text{L}$  THF solution of **P4** and **PS**,  $[\text{P4}] = 5.0\text{ mg/mL}$ ,  $[\text{PS}] = 5.0\text{ mg/mL}$ . (7)

**Figure S7.** (a) Plot of  $I/I_0$  vs temperature of **P4**. (b) The particle size and solution turbidity (kcps) vs temperature of **P4**.  $[\text{P4}] = 0.5\text{ mg/mL}$ ,  $10.0\text{ mM}$   $\text{Na}_2\text{HPO}_4$ -citric acid buffer,  $I_0$  and  $I$  are the fluorescence intensity at  $14\text{ }^\circ\text{C}$  and a measured temperature, respectively. The fluorescence intensity was recorded at  $469\text{ nm}$ ;  $\lambda_{\text{ex}} = 318\text{ nm}$ . (8)

**Figure S8.**  $^1\text{H}$  NMR spectra of **P4** in  $\text{D}_2\text{O}$  at various temperatures. (8)

**Figure S9.** Plot of fluorescence intensity vs temperature of **P4** with different concentration in  $\text{H}_2\text{O}$ . Concentration of copolymers **P4** is  $0.25$ ,  $0.50$  and  $1.0\text{ mg/mL}$ , respectively. Fluorescence was measured at  $469\text{ nm}$ , excited at  $318\text{ nm}$ . (9)

**Figure S10.**  $^1\text{H}$  NMR spectrum of monomer (**M1**). (9)

**Figure S11.**  $^{13}\text{C}$  NMR spectrum of monomer (**M1**). (10)

**Figure S12.** HRMS spectrum of monomer (**M1**). (10)

**Figure S13.** FTIR spectrum of monomer (**M1**). (11)

**Figure S14.**  $^{13}\text{C}$  NMR spectrum of **P1** in  $\text{CDCl}_3$ . (11)

**Figure S15.** FTIR spectrum of **P1**. (12)

**Figure S16.**  $^1\text{H}$  NMR spectrum of **P2** in  $\text{CDCl}_3$ . (12)

**Figure S17.**  $^{13}\text{C}$  NMR spectrum of **P2** in  $\text{CDCl}_3$ . (13)

|                                                                                   |      |      |
|-----------------------------------------------------------------------------------|------|------|
| <b>Figure S18.</b> FTIR spectrum of <b>P2</b> .                                   | (13) |      |
| <b>Figure S19.</b> $^1\text{H}$ NMR spectrum of <b>P3</b> in $\text{CDCl}_3$ .    |      | (14) |
| <b>Figure S20.</b> $^{13}\text{C}$ NMR spectrum of <b>P3</b> in $\text{CDCl}_3$ . |      | (14) |
| <b>Figure S21.</b> FTIR spectrum of <b>P3</b> .                                   | (15) |      |
| <b>Figure S22.</b> $^1\text{H}$ NMR spectrum of <b>P4</b> in $\text{CDCl}_3$ .    |      | (15) |
| <b>Figure S23.</b> $^{13}\text{C}$ NMR spectrum of <b>P4</b> in $\text{CDCl}_3$ . |      | (16) |
| <b>Figure S24.</b> FTIR spectrum of <b>P4</b> .                                   | (16) |      |
| <b>Figure S25.</b> $^1\text{H}$ NMR spectrum of <b>P5</b> in $\text{CDCl}_3$ .    |      | (17) |
| <b>Figure S26.</b> FTIR spectrum of <b>P5</b> .                                   | (17) |      |
| <b>Figure S27.</b> $^1\text{H}$ NMR spectrum of <b>P6</b> in $\text{CDCl}_3$ .    |      | (18) |
| <b>Figure S28.</b> FTIR spectrum of <b>P6</b> .                                   | (18) |      |
| <b>Reference</b>                                                                  |      | (19) |

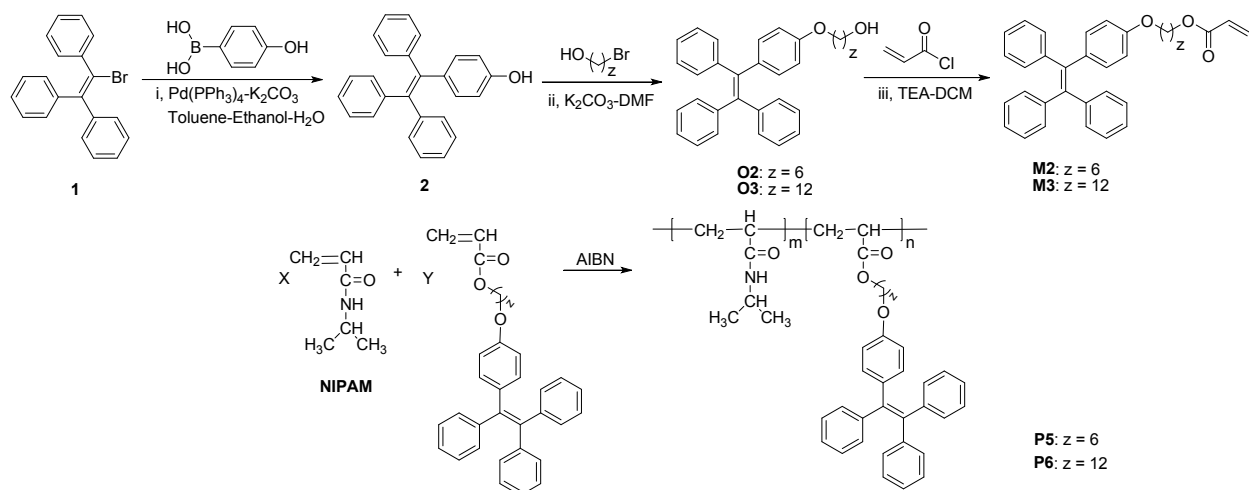

**Scheme S1.** Synthetic routes of monomers (**M2** and **M3**)<sup>1,2</sup> and corresponding copolymers (**P5** and **P6**).

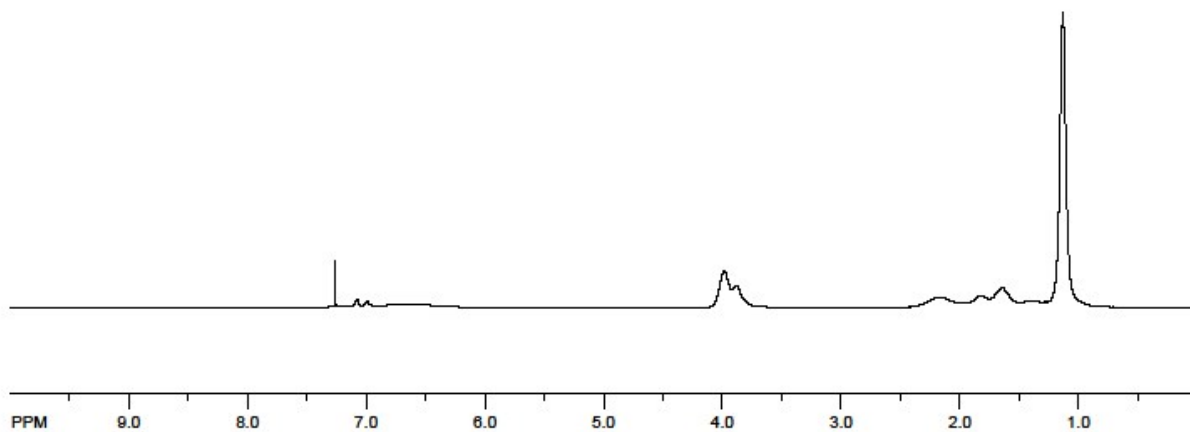

**Figure S1.**  $^1\text{H}$  NMR spectrum of **P1** in  $\text{CDCl}_3$ .

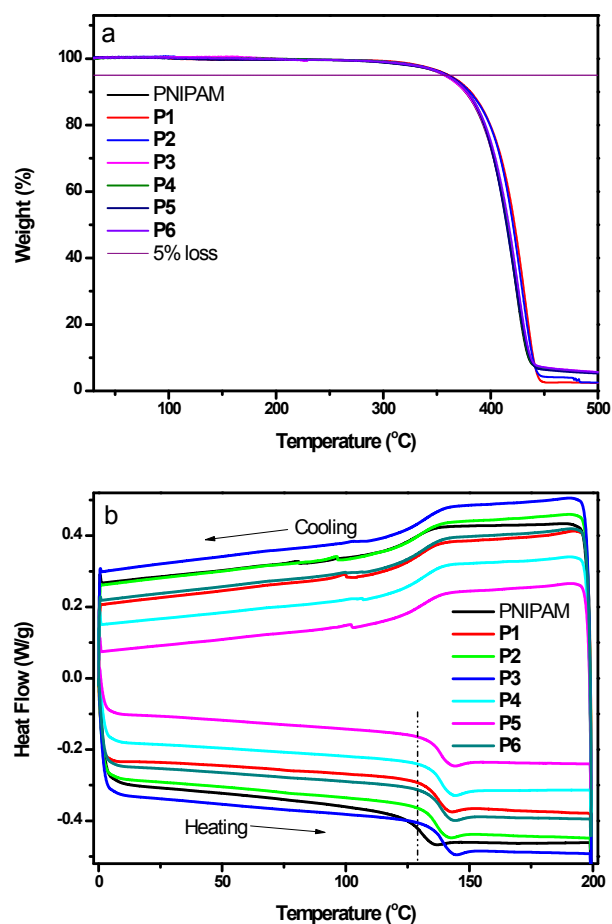

**Figure S2.** (a) TGA thermograms of PNIPAM and **P1-6** recorded under nitrogen at a heating rate of 20 °C/min. (b) DSC thermograms of PNIPAM and **P1-6** recorded under nitrogen at a heating rate of 10 °C/min.

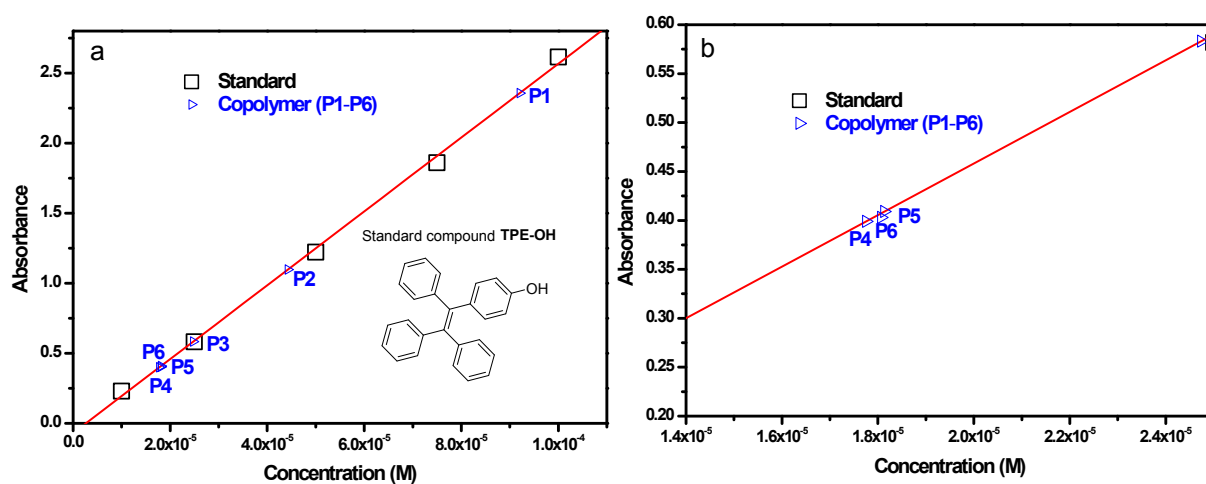

**Figure S3.** (a) Calibration curve for determination of copolymer composition, using 4-(1,2,2-triphenylvinyl)phenol (TPE-OH) as standard. (b) Enlarged calibration curve for

**P4-P6.** The absorbance of TPE-OH at 318 nm was recorded in the presence of PNIPAM in THF. [TPE-OH] =  $10^{-5}$  to  $10^{-4}$  M, [PNIPAM] = 0.50 mg/mL, 20 °C. Open squares and circles are the data points for the standard and the copolymers, respectively.

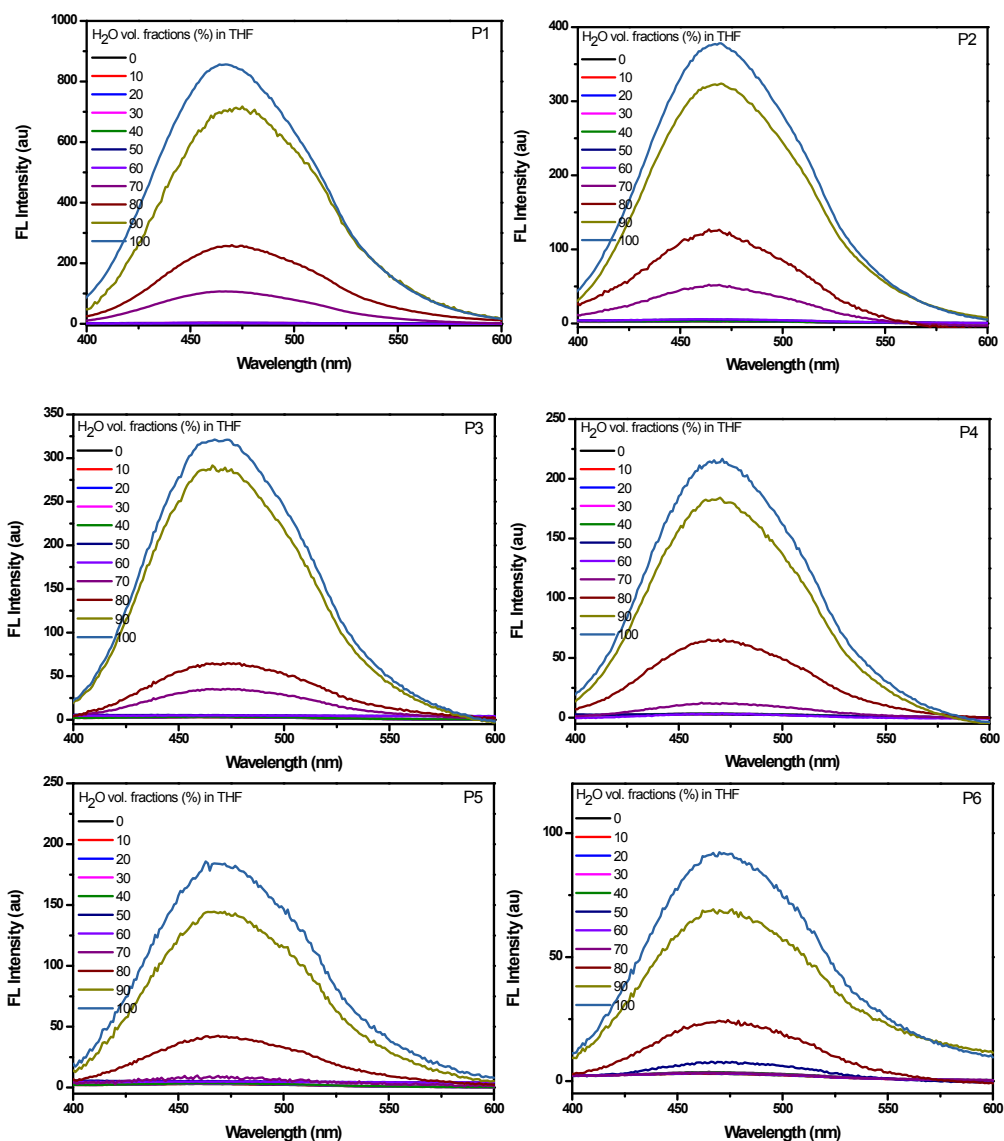

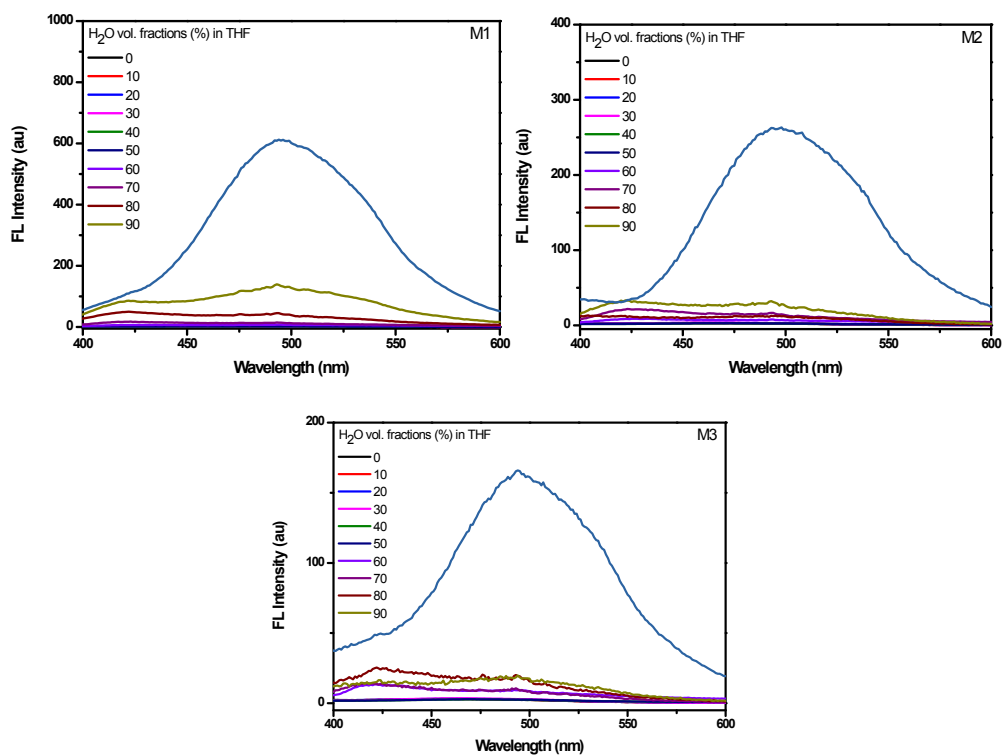

**Figure S4.** Fluorescence spectra of polymer **P1-6** in THF/H<sub>2</sub>O mixtures ( $\lambda_{\text{ex}} = 318$  nm,  $[\text{P4}] = 0.5$  mg/mL, 20 °C).

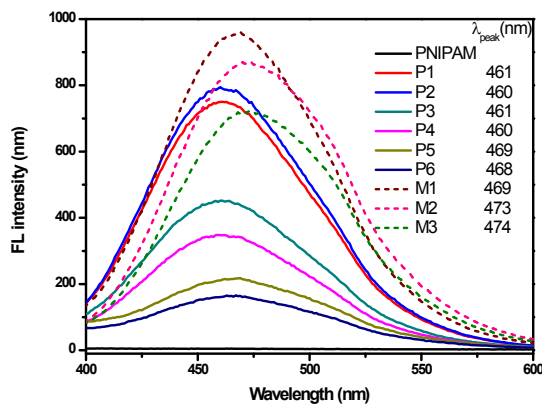

**Figure S5.** Fluorescence spectra of monomers (**M1-3**) and copolymers (**P1-6**) in solid state. Films were fabricated by drop coating of 50.0  $\mu\text{L}$  THF solution,  $[\text{C}] = 5.0$  mg/mL.

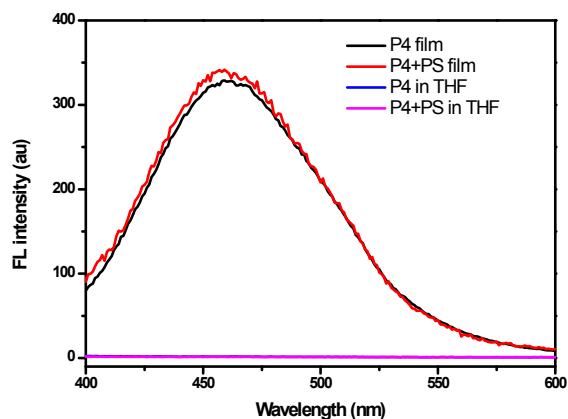

**Figure S6.** Fluorescence spectra of polymer in solution and film. **P4** and **P4+PS** in THF,  $[P4] = 0.5 \text{ mg/mL}$ ,  $[PS] = 0.5 \text{ mg/mL}$ . **P4** film was fabricated by drop coating of  $50.0 \mu\text{L}$  THF solution of **P4**,  $[P4] = 5.0 \text{ mg/mL}$ . **P4+PS** film was fabricated by drop coating of  $50.0 \mu\text{L}$  THF solution of **P4** and **PS**,  $[P4] = 5.0 \text{ mg/mL}$ ,  $[PS] = 5.0 \text{ mg/mL}$ .

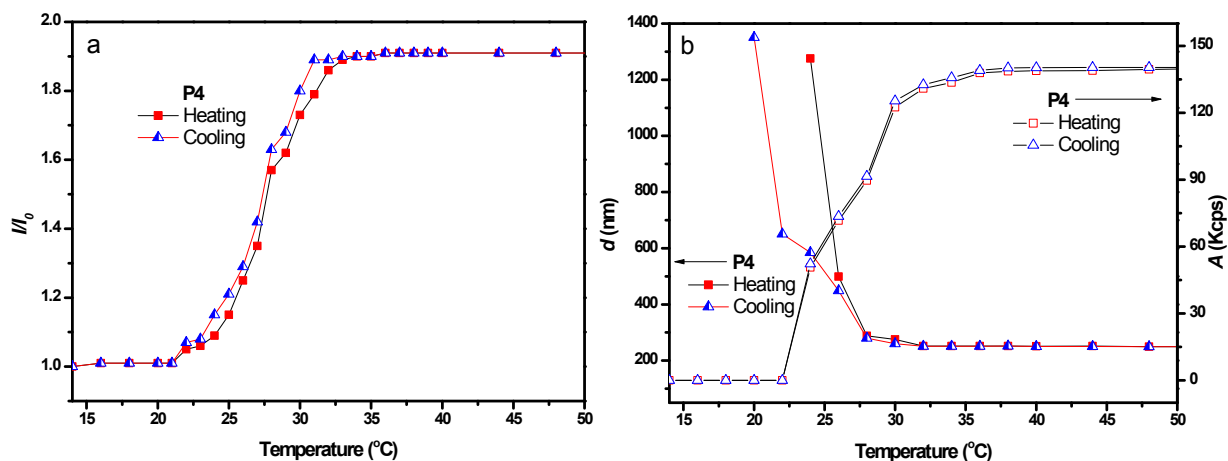

**Figure S7.** (a) Plot of  $I/I_0$  vs temperature of **P4**. (b) The particle size and solution turbidity (kcps) vs temperature of **P4**.  $[P4] = 0.5 \text{ mg/mL}$ ,  $10.0 \text{ mM Na}_2\text{HPO}_4$ -citric acid buffer,  $I_0$  and  $I$  are the fluorescence intensity at  $14^\circ\text{C}$  and a measured temperature, respectively. The fluorescence intensity was recorded at  $469 \text{ nm}$ ;  $\lambda_{\text{ex}} = 318 \text{ nm}$ .



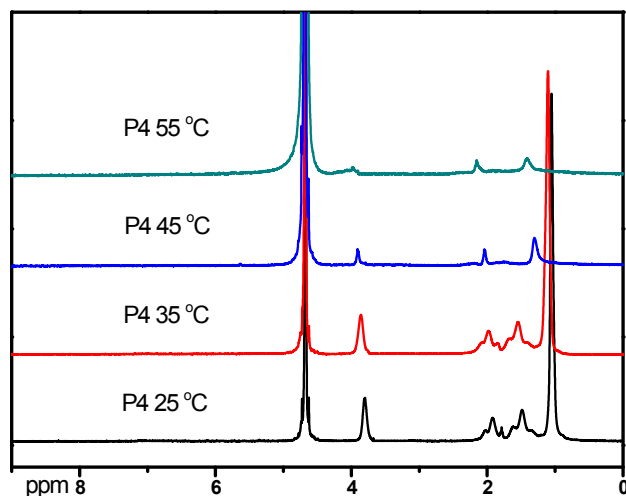

**Figure S8.**  $^1\text{H}$  NMR spectra of **P4** in  $\text{D}_2\text{O}$  at various temperatures,  $[\text{C}] = 0.5 \text{ mg/mL}$ , scan number = 80.

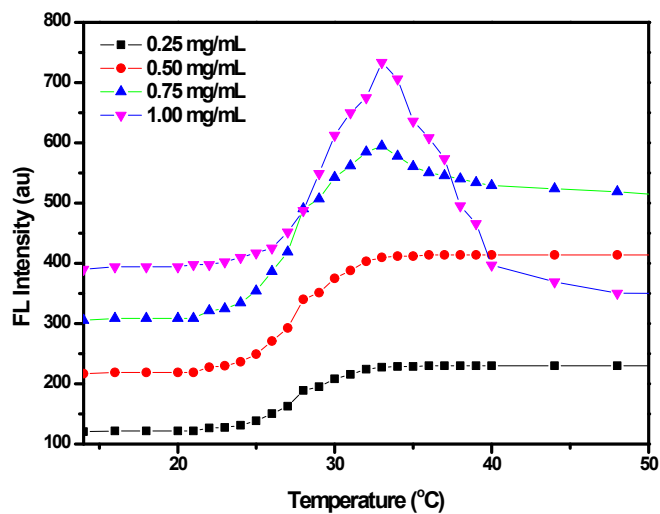

**Figure S9.** Plot of fluorescence intensity vs temperature of **P4** with different concentration in  $\text{H}_2\text{O}$ . Concentration of copolymers **P4** is 0.25, 0.50 and 1.0 mg/mL, respectively. Fluorescence was measured at 469 nm, excited at 318 nm.

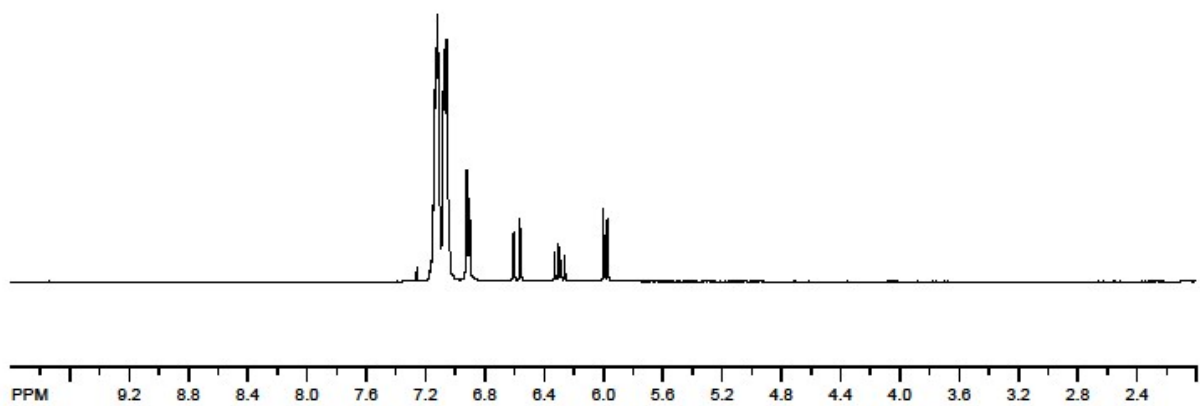

**Figure S10.**  $^1\text{H}$  NMR spectrum of monomer (M1).

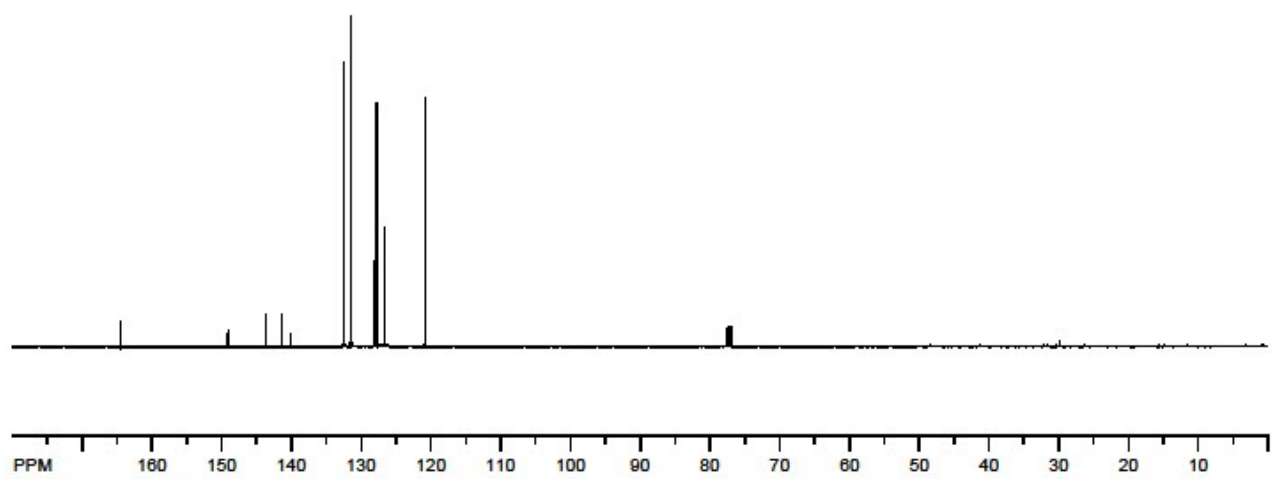

**Figure S11.**  $^{13}\text{C}$  NMR spectrum of monomer (M1).

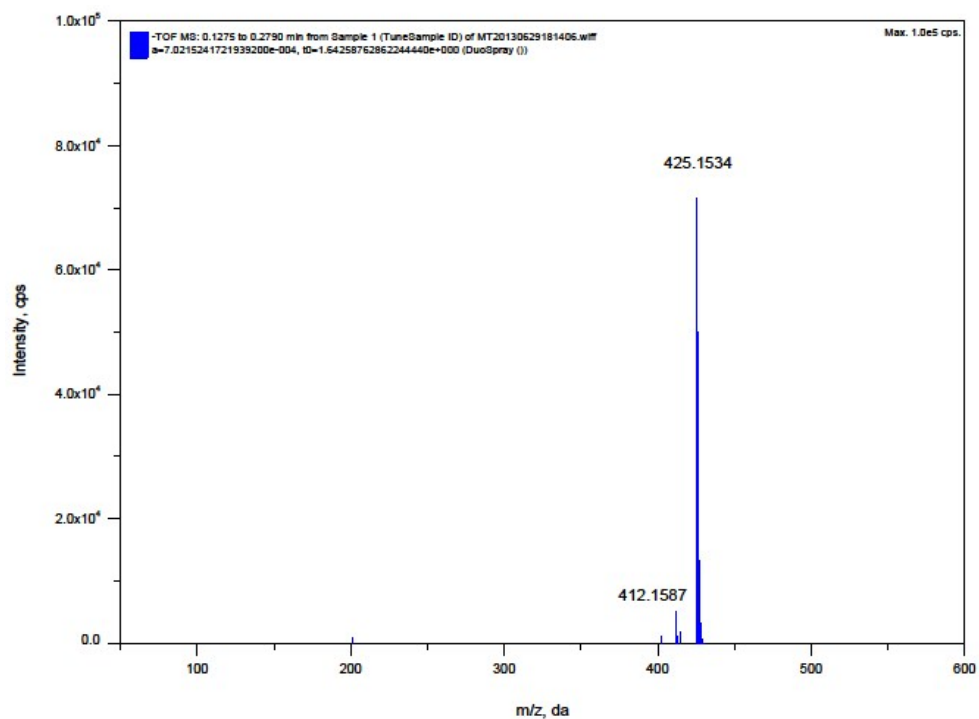

**Figure S12.** HRMS spectrum of monomer (**M1**).

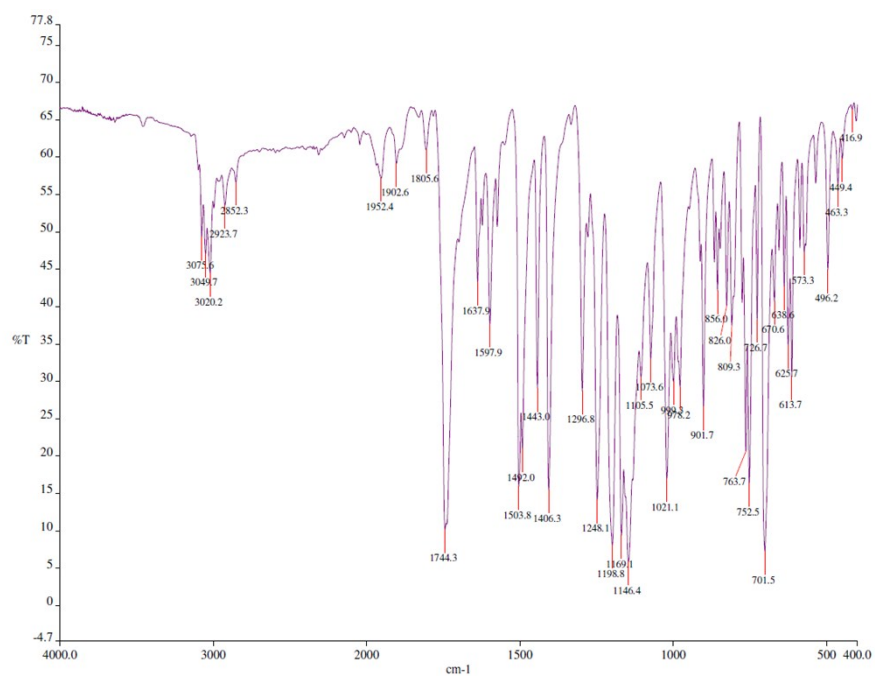

**Figure S13.** FTIR spectrum of monomer (**M1**).

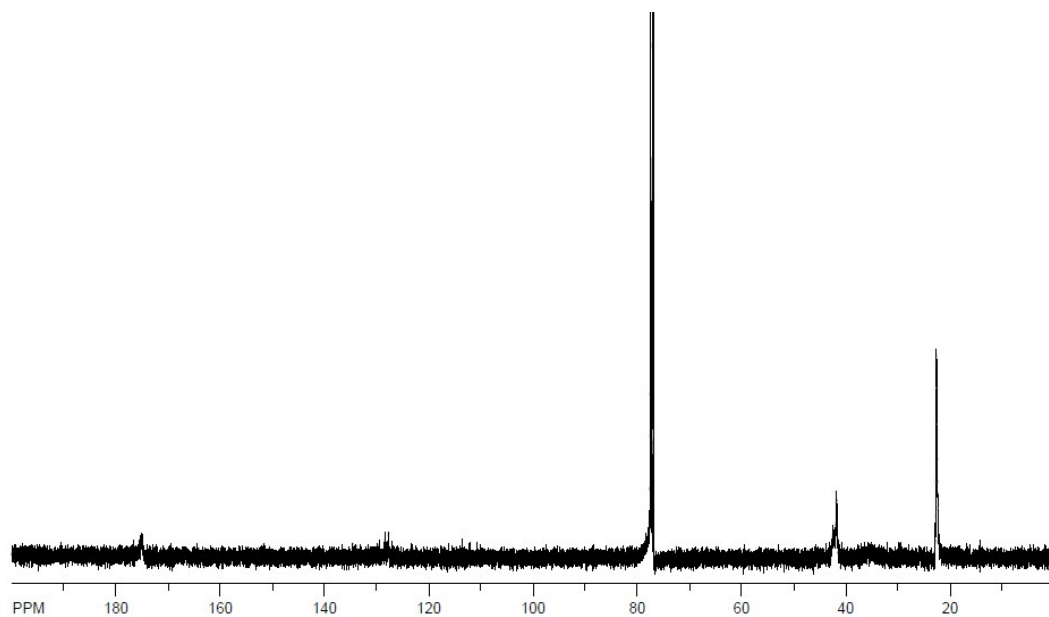

**Figure S14.** <sup>13</sup>C NMR spectrum of P1 in CDCl<sub>3</sub>.

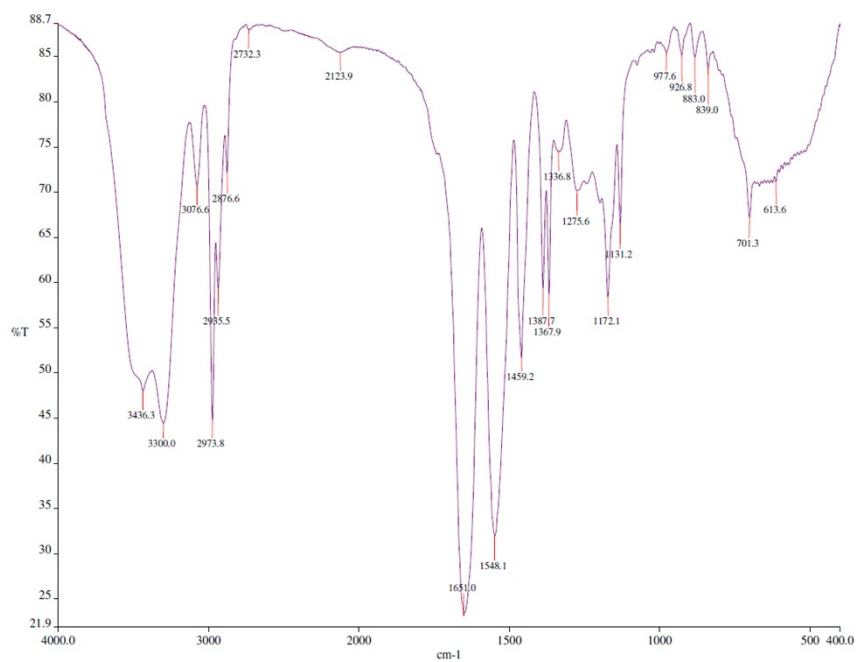

**Figure S15.** FTIR spectrum of P1.

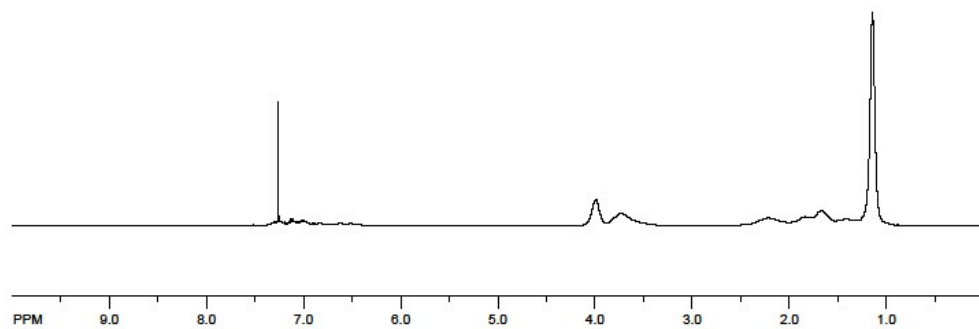

**Figure S16.**  $^1\text{H}$  NMR spectrum of **P2** in  $\text{CDCl}_3$ .

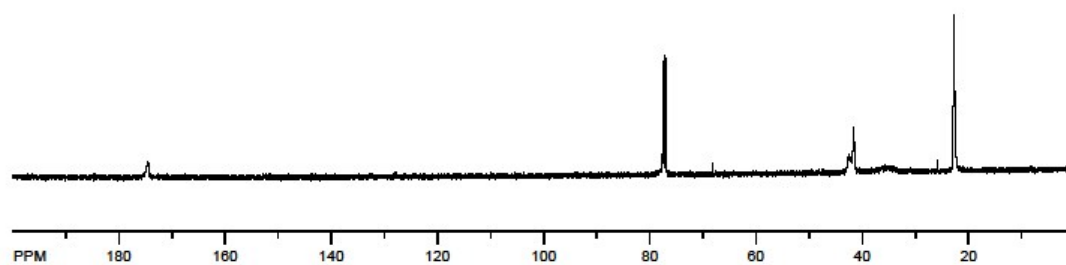

**Figure S17.**  $^{13}\text{C}$  NMR spectrum of **P2** in  $\text{CDCl}_3$ .

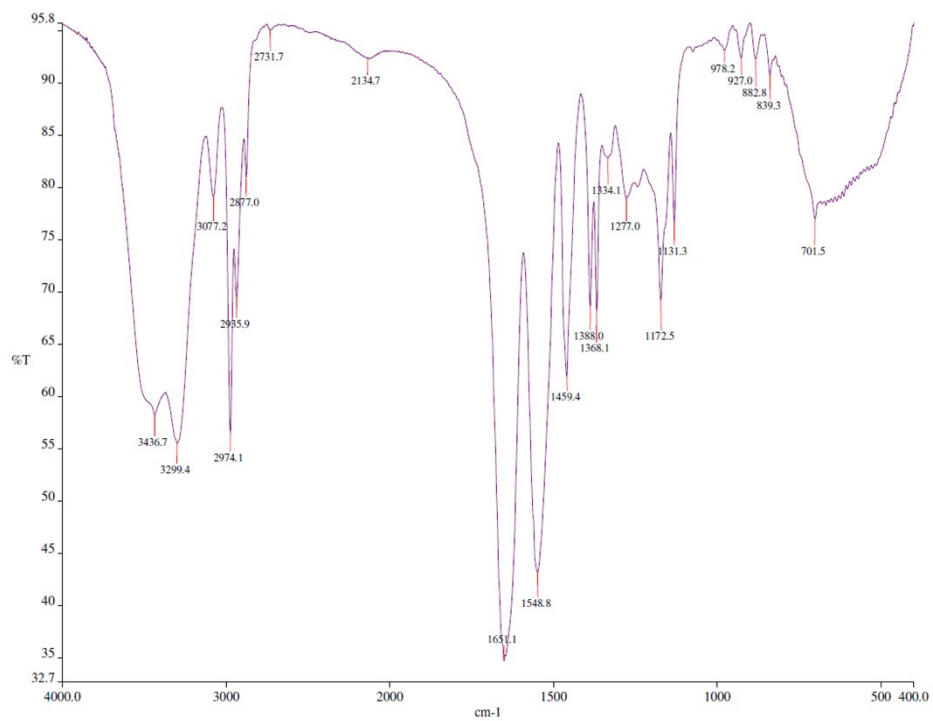

**Figure S18.** FTIR spectrum of **P2**.

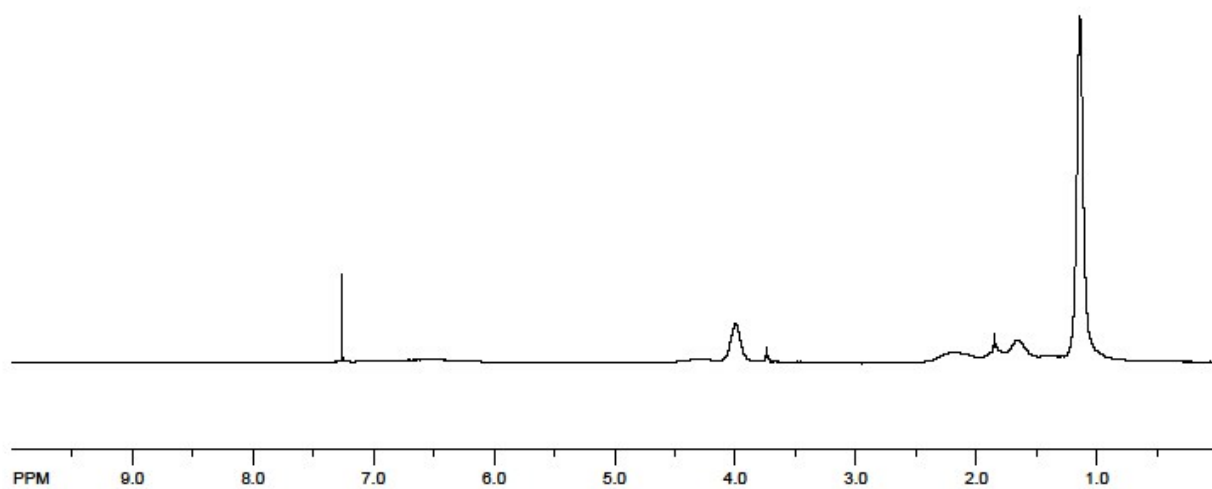

**Figure S19.** <sup>1</sup>H NMR spectrum of **P3** in CDCl<sub>3</sub>.

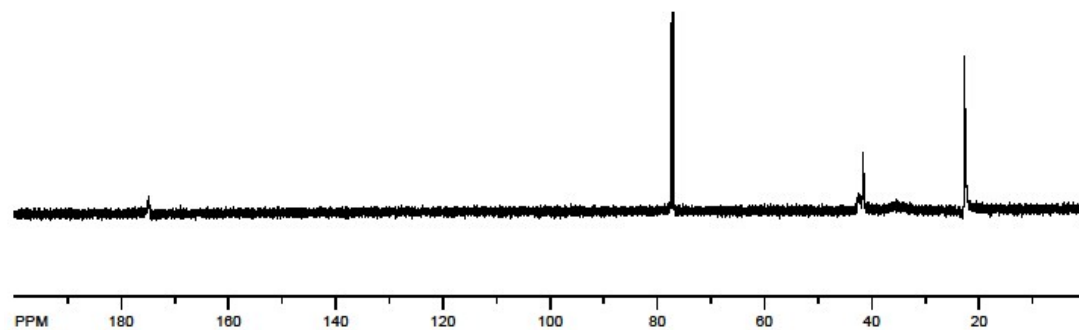

**Figure S20.** <sup>13</sup>C NMR spectrum of **P3** in CDCl<sub>3</sub>.

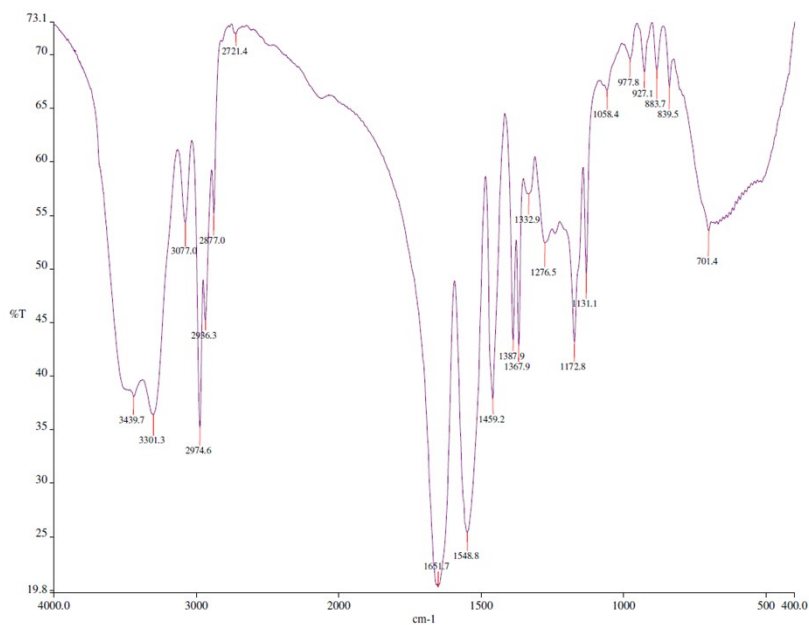

**Figure S21.** FTIR spectrum of **P3**.

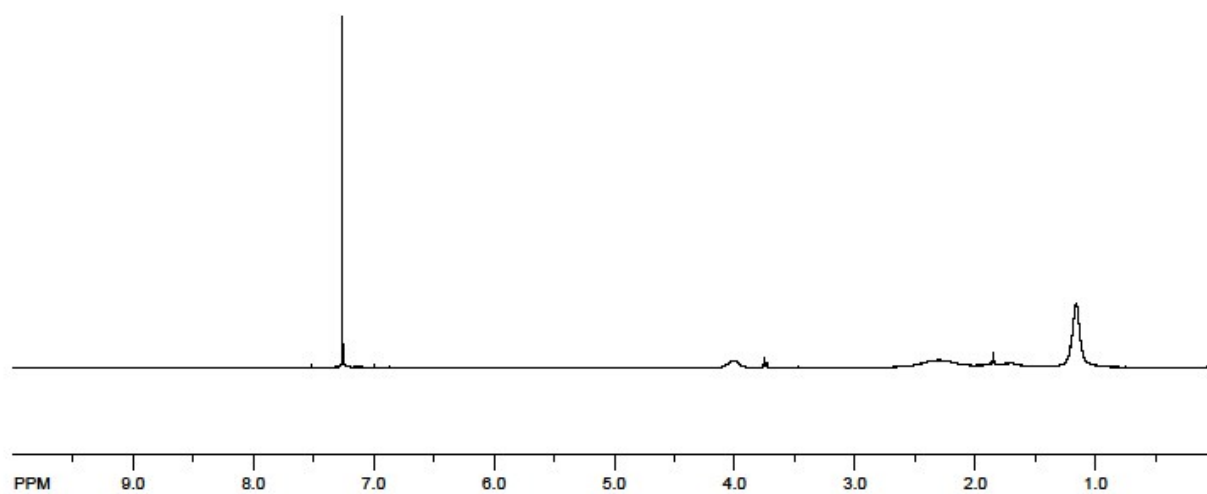

**Figure S22.**  $^1\text{H}$  NMR spectrum of **P4** in  $\text{CDCl}_3$ .

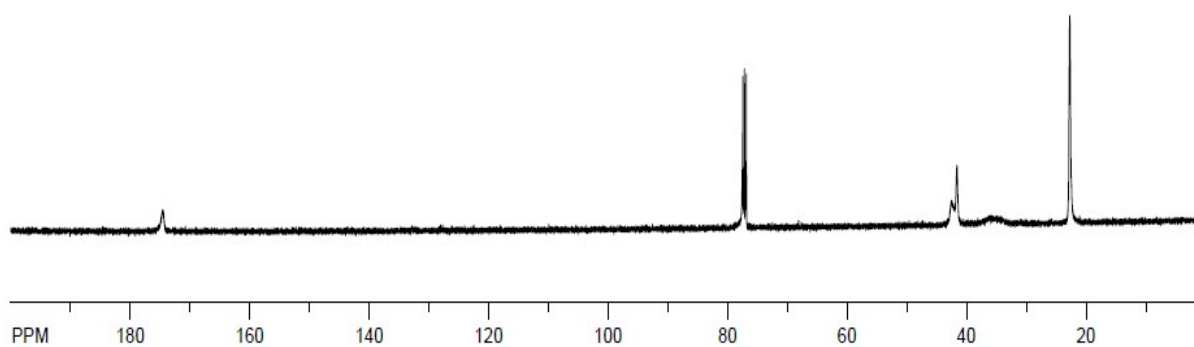

**Figure S23.**  $^{13}\text{C}$  NMR spectrum of **P4** in  $\text{CDCl}_3$ .



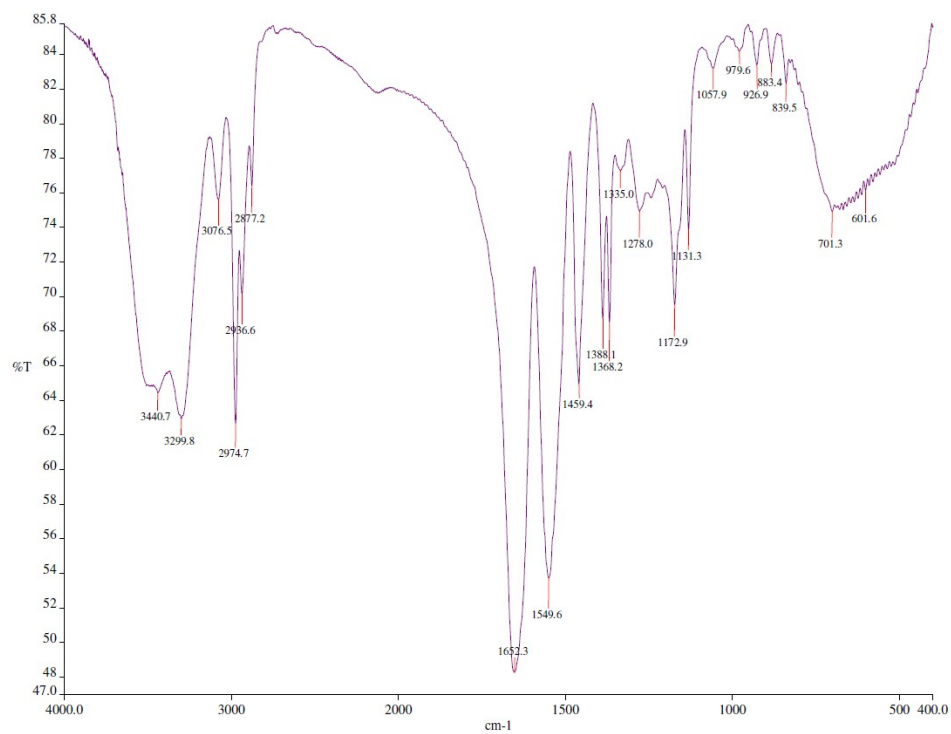

**Figure S24.** FTIR spectrum of **P4**.

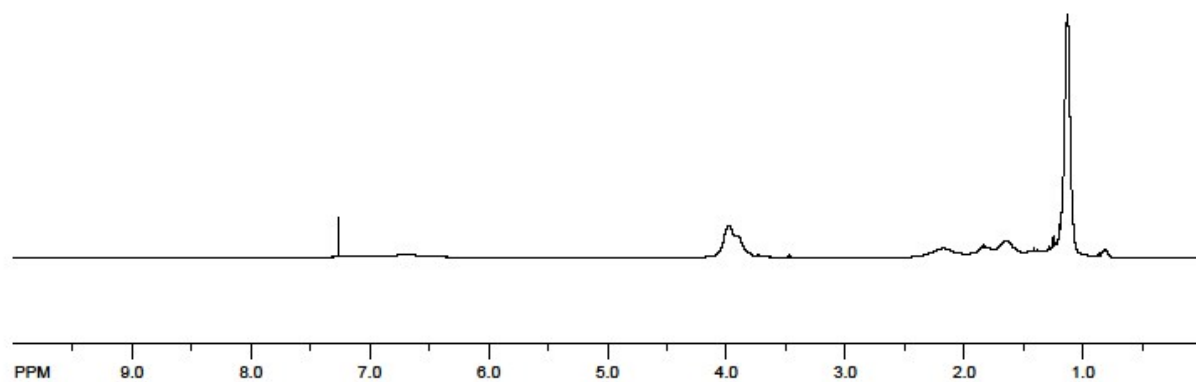

**Figure S25.** <sup>1</sup>H NMR spectrum of **P5** in CDCl<sub>3</sub>.

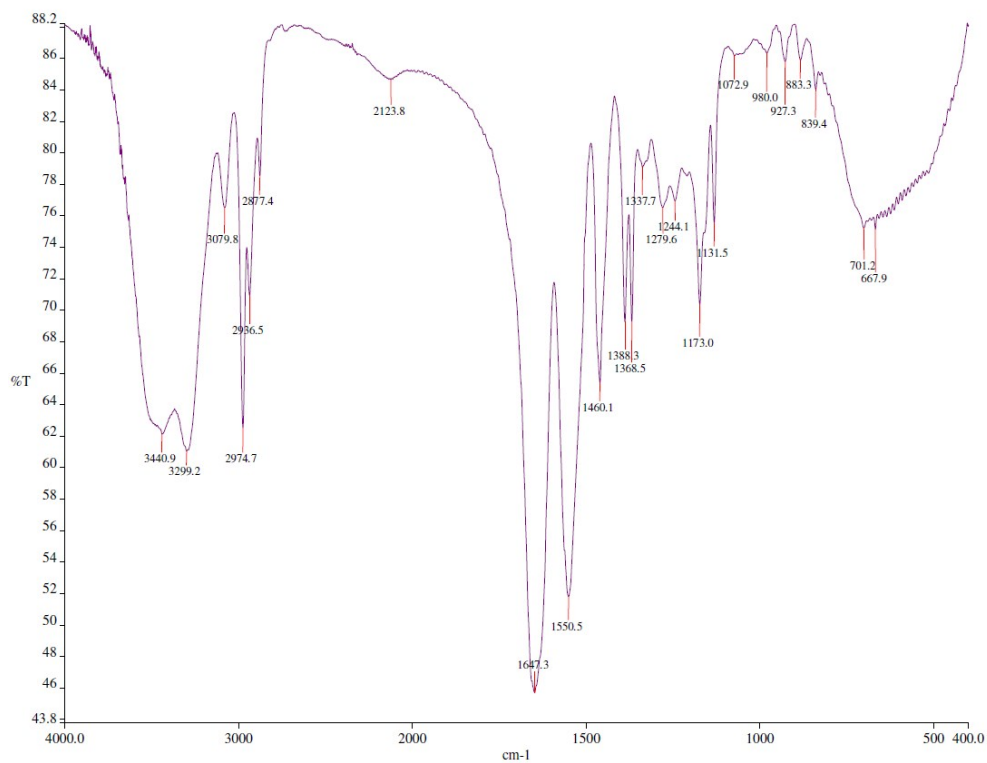

**Figure S26.** FTIR spectrum of **P5**.

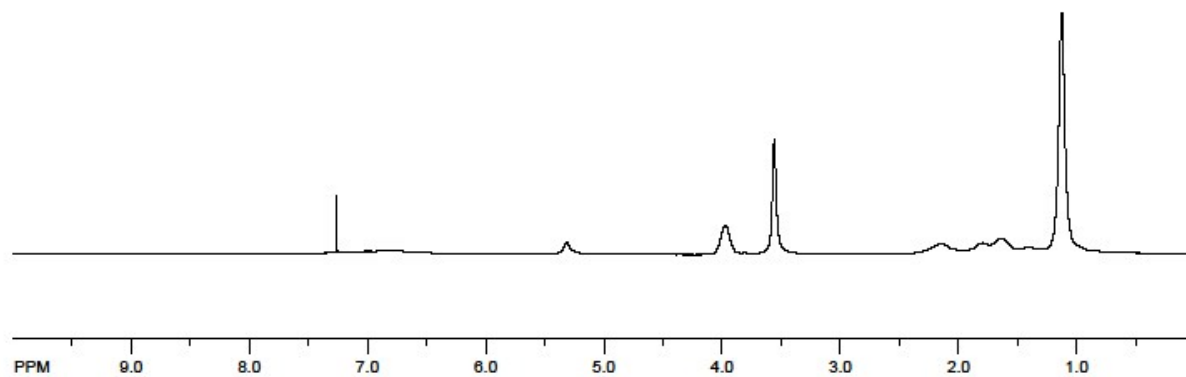

**Figure S27.** <sup>1</sup>H NMR spectrum of **P6** in CDCl<sub>3</sub>.

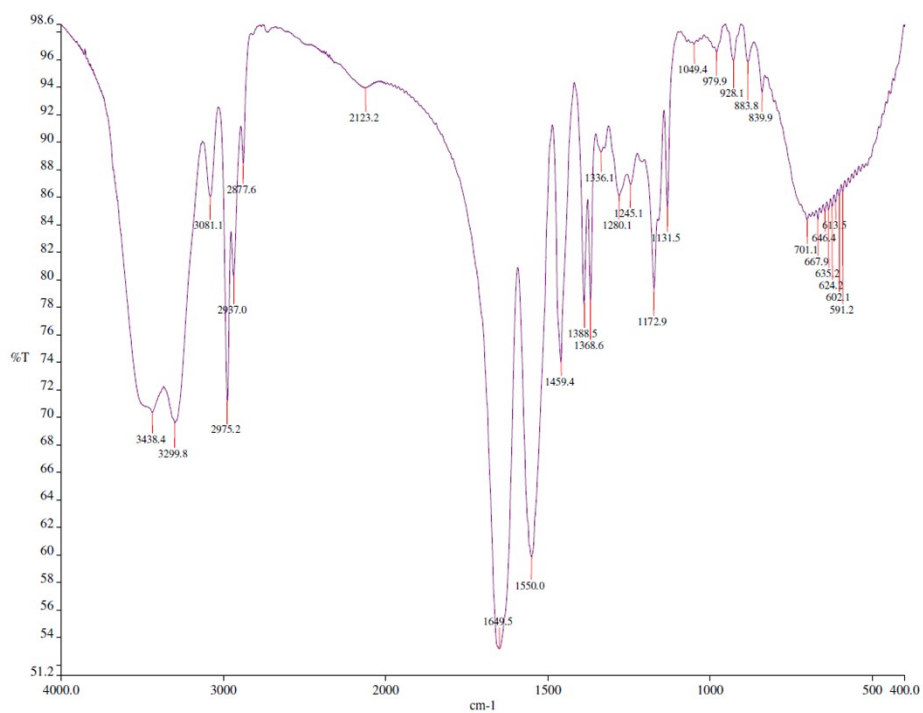

**Figure S28.** FTIR spectrum of **P6**.

## REFERENCES

- (1) Zhou, H.; Li, J.; Chua, M. H.; Yan, H.; Tang, B. Z.; Xu, J. *Polym. Chem.* **2014**, *5*, 5628.
- (2) Zhou, H.; Ye, Q.; Neo, W. T.; Song, J.; Yan, H.; Zong, Y.; Tang, B. Z.; Hor, T. S. A.; Xu, J. *Chem. Commun.* **2014**, *50*, 13785.
